# Supplementary material for: Ag microparticles embedded in Si nanowire arrays: a novel catalyst for gas-phase oxidation of high alcohol to aldehyde
Source: Royal Society of Chemistry journal article supplement (doi:10.1039/b807354f), 2008-01-01
Supplement: b807354f.pdf [file b807354f.pdf]

## Electronic Supplementary Information

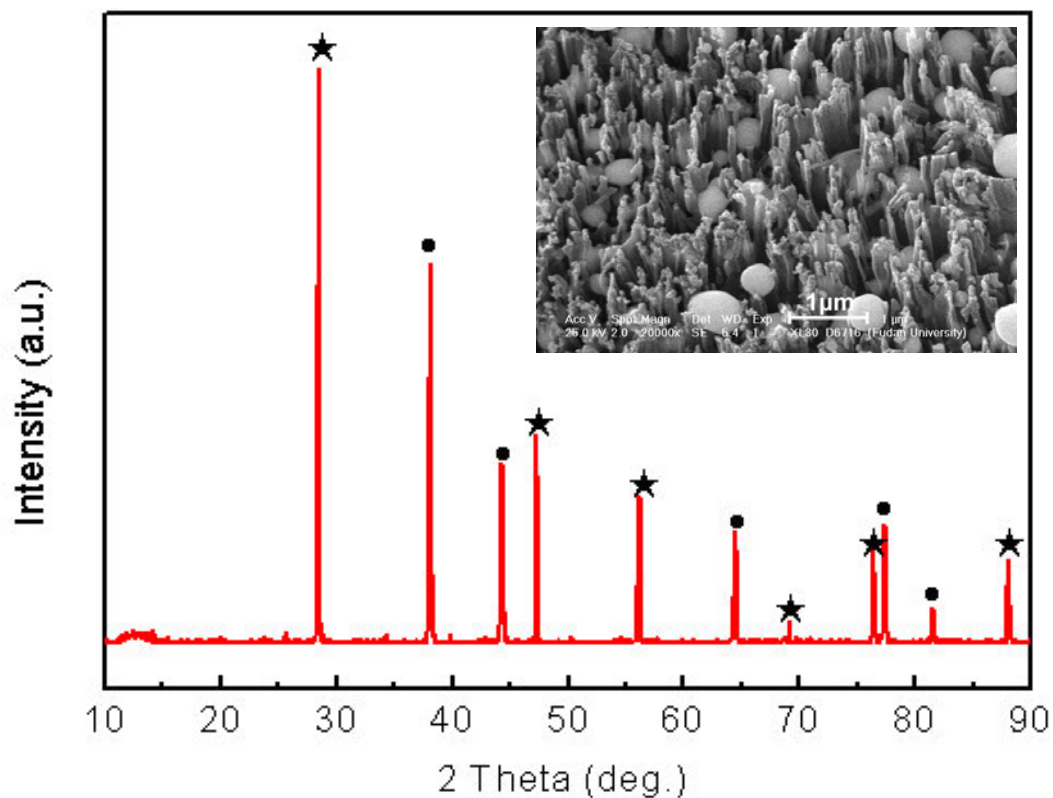

**Fig. S1** XRD pattern of Ag@SiNW after being calcined at 450 °C for 2 h (● - Ag, ★ - Si). The inset is SEM image of Ag@SiNW, scale bar 1 μm. It indicates the existence of Ag in SiNW arrays as metallic silver after calcination.
